# Supplementary material for: Genetic variants at the RTP4/MASP1 locus are associated with fatigue in Scandinavian patients with primary Sjögren’s syndrome
Source: HighWire-hosted journal article supplement (doi:10.1136/rmdopen-2021-001832), 2021-12-01
Supplement: rmdopen-2021-001832supp001_data_supplement.pdf [file rmdopen-2021-001832supp001_data_supplement.pdf]

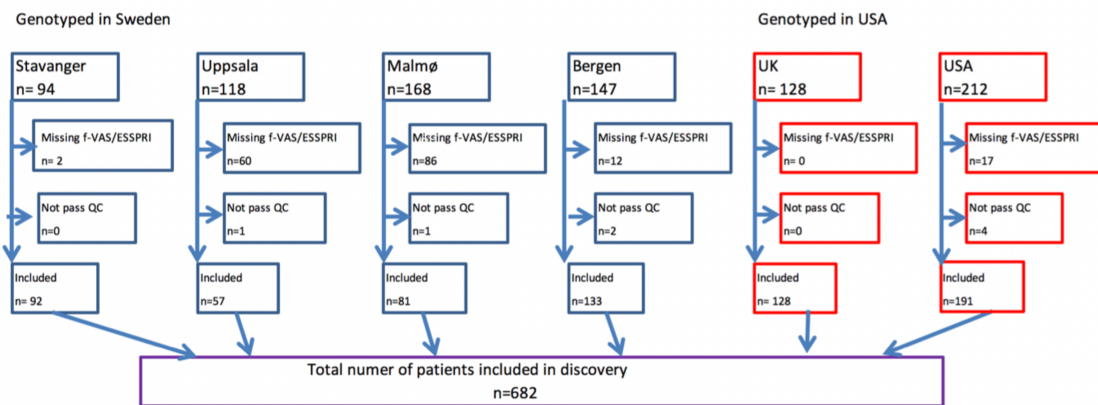

### Supplementary Figure S1

Flowchart showing inclusion of patients from each of the six centers with fatigue data available.

QC, quality control; f-VAS, fatigue Visual Analog Scale.

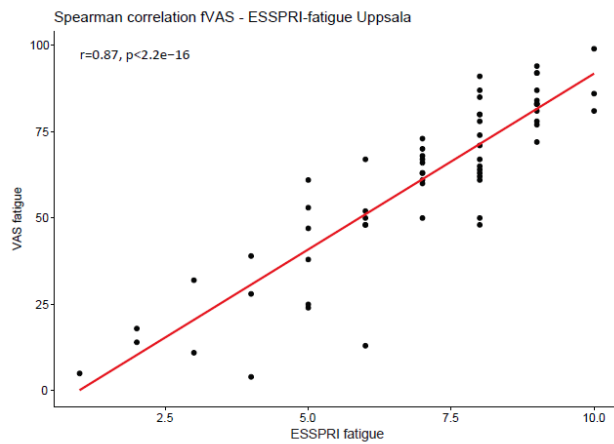

### Supplementary Figure S2

Spearman's rank correlation coefficient ( $r_s$ ) between fVAS and ESSPRI fatigue item values was tested in  $n=58$  patients from Uppsala, Sweden with  $p<0.05$  defining significance.

ESSPRI, European League Against Rheumatism Sjögren's Syndrome Patient Reported Index; fVAS, fatigue Visual Analog Scale.

**A**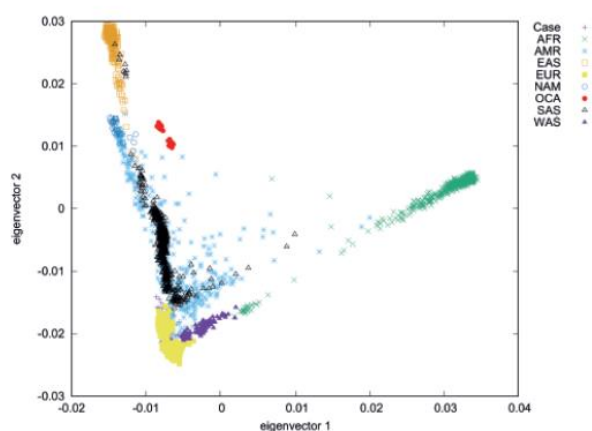**B**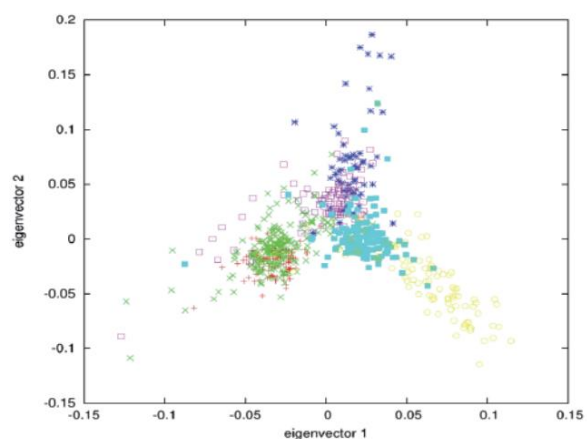

### Supplementary Figure S3

**A** Performing a supervised PCA, the genotype data of all patients included in the study ( $n=690$ ) were projected on a combined reference panel from annotated populations (1000 Genomes and the Human Genome Diversity Project). Study samples that clustered together with the European reference population (i.e.  $<5$  SD from the European reference mean in the first five components of variation) were kept for further analyses. **B** An unsupervised PCA was performed to increase intra-cohort homogeneity. Study samples within  $<5$  SD from the corresponding cohort mean in the first three principal components of variation were kept, resulting in  $n=682$  patients to be included in the GWAS analyses.

GWAS, genome-wide association study; PCA, Principal Component Analysis; SD, standard deviation.

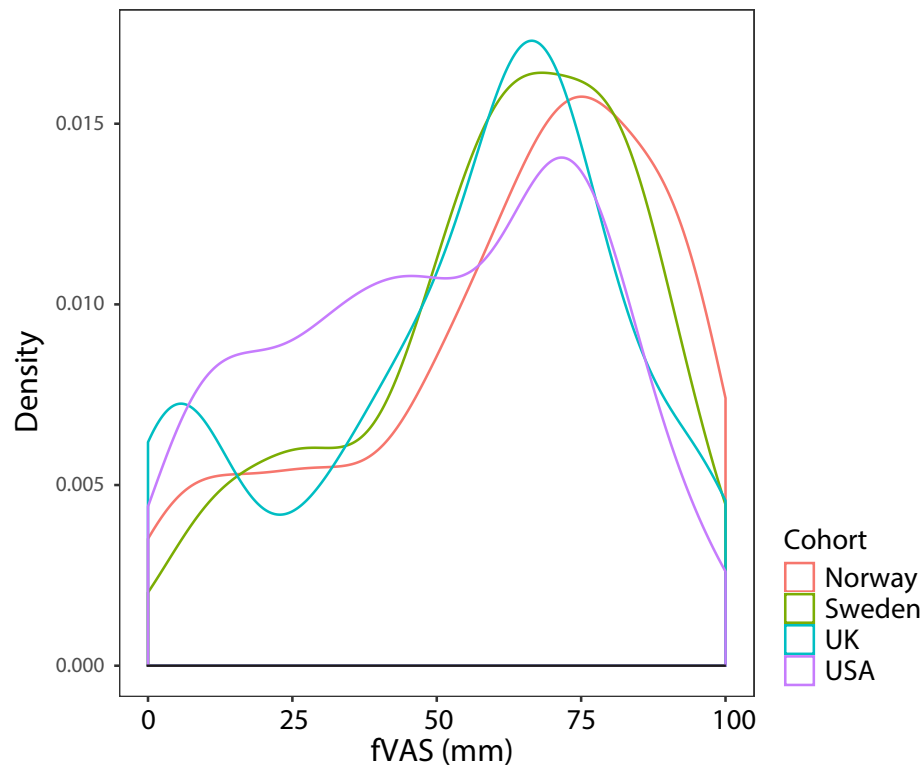**Supplementary Figure S4**

Density plot visualizing the distribution of fVAS values for patients with pSS in each of the four study cohorts.

fVAS, fatigue Visual Analog Scale.

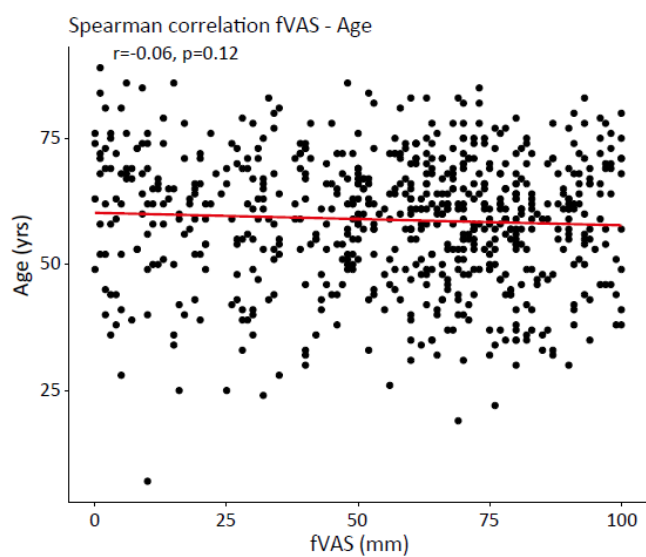

### Supplementary Figure S5

Spearman's rank correlation coefficient ( $r_s$ ) between fVAS and patient age was tested in all individuals included in the association analyses ( $n=682$ ) with  $p < 0.05$  defining significance.

fVAS, fatigue Visual Analog Scale.

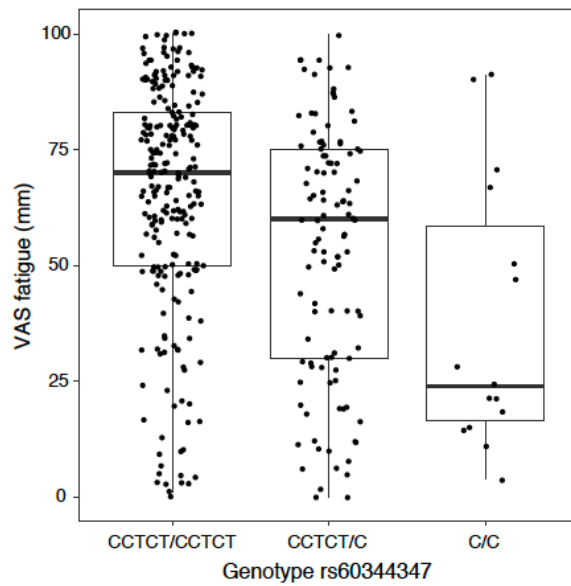

### Supplementary Figure S6

Association between genotype at *RTP4/MASP1* top variant rs60344347 with fVAS levels in patients with pSS included in the meta-analysis of the Norwegian and Swedish cohorts. Boxes represent median and interquartile range, whiskers indicate total range.

fVAS, fatigue Visual Analog Scale.
