# Supplementary material for: Genetic variants at the RTP4/MASP1 locus are associated with fatigue in Scandinavian patients with primary Sjögren’s syndrome
Source: HighWire-hosted journal article supplement (doi:10.1136/rmdopen-2021-001832), 2021-12-01
Supplement: rmdopen-2021-001832supp002_data_supplement.pdf [file rmdopen-2021-001832supp002_data_supplement.pdf]

**Supplementary Table S1** Level of fatigue in Scandinavian patients with primary Sjögren's syndrome stratified for SSA and SSB autoantibody status

|                                | <b>SSA negative</b>     | <b>SSA positive</b>     | <b>P-value</b> <sup>‡</sup> |
|--------------------------------|-------------------------|-------------------------|-----------------------------|
| fVAS, mean ( $\pm$ sd), median | 64 ( $\pm$ 25), 65      | 60 ( $\pm$ 27), 66      | 0.34                        |
|                                | <b>SSA/SSB negative</b> | <b>SSA/SSB positive</b> | <b>P-value</b> <sup>‡</sup> |
| fVAS, mean ( $\pm$ sd), median | 62 ( $\pm$ 26), 66      | 59 ( $\pm$ 27), 64      | 0.39                        |

<sup>‡</sup> Two-tailed Mann-Whitney *U* test p-value.

fVAS, fatigue Visual Analog Scale; SSA, Sjögren's syndrome related antigen A; SSB, Sjögren's syndrome related antigen B
