# Supplementary material for: Genetic variants at the RTP4/MASP1 locus are associated with fatigue in Scandinavian patients with primary Sjögren’s syndrome
Source: HighWire-hosted journal article supplement (doi:10.1136/rmdopen-2021-001832), 2021-12-01
Supplement: rmdopen-2021-001832supp003_data_supplement.pdf [file rmdopen-2021-001832supp003_data_supplement.pdf]

**Supplementary Table S2** Genetic variants associated with the level of fatigue at suggestive significance ( $p < 1.0E-05$ ) in patients with primary Sjögren's syndrome in the Norwegian cohort (n=225)

| SNP ID      | Chr | Position (hg19) | A1  | A2 | MAF  | P-value  | Beta (SE) <sup>‡</sup> | Gene symbol  | Closest gene |
|-------------|-----|-----------------|-----|----|------|----------|------------------------|--------------|--------------|
| rs1969700   | 20  | 40147826        | G   | A  | 0.37 | 8.48E-07 | 12.89 (2.55)           | CHD6         | CHD6         |
| rs6102453   | 20  | 40162911        | A   | G  | 0.38 | 1.13E-06 | 12.74 (2.55)           | CHD6         | CHD6         |
| rs1535223   | 20  | 40147871        | C   | G  | 0.37 | 2.70E-06 | 12.33 (2.57)           | CHD6         | CHD6         |
| rs1535224   | 20  | 40147895        | C   | G  | 0.37 | 2.70E-06 | 12.33 (2.57)           | CHD6         | CHD6         |
| rs6072406   | 20  | 40162781        | C   | A  | 0.37 | 3.05E-06 | 12.25 (2.56)           | CHD6         | CHD6         |
| rs6072405   | 20  | 40158754        | A   | G  | 0.37 | 3.06E-06 | 12.25 (2.56)           | CHD6         | CHD6         |
| rs6102452   | 20  | 40158344        | G   | A  | 0.37 | 3.06E-06 | 12.25 (2.56)           | CHD6         | CHD6         |
| rs6093492   | 20  | 40155005        | C   | T  | 0.37 | 3.07E-06 | 12.24(2.56)            | CHD6         | CHD6         |
| rs6065367   | 20  | 40155375        | C   | T  | 0.37 | 3.08E-06 | 12.24 (2.56)           | CHD6         | CHD6         |
| rs6065366   | 20  | 40154517        | G   | T  | 0.37 | 3.09E-06 | 12.24 (2.56)           | CHD6         | CHD6         |
| rs6072403   | 20  | 40150586        | C   | T  | 0.37 | 3.20E-06 | 12.23 (2.56)           | CHD6         | CHD6         |
| rs6072402   | 20  | 40150552        | A   | G  | 0.37 | 3.21E-06 | 12.23 (2.56)           | CHD6         | CHD6         |
| rs55967559  | 20  | 40151029        | ACG | A  | 0.37 | 3.21E-06 | 12.23 (2.56)           | CHD6         | CHD6         |
| rs2547952   | 5   | 98051255        | T   | C  | 0.09 | 4.26E-06 | 19.28 (4.09)           | NA           | RGMB         |
| rs2547953   | 5   | 98051323        | T   | C  | 0.09 | 4.26E-06 | 19.28 (4.09)           | NA           | RGMB         |
| rs2547956   | 5   | 98052063        | T   | C  | 0.09 | 4.27E-06 | 19.28 (4.09)           | NA           | RGMB         |
| rs1828167   | 5   | 98057709        | T   | C  | 0.09 | 4.54E-06 | 19.19 (4.09)           | NA           | RGMB         |
| rs74512191  | 3   | 71383767        | C   | T  | 0.23 | 4.71E-06 | 14.01 (2.99)           | FOXP1        | FOXP1        |
| rs6093493   | 20  | 40157273        | C   | T  | 0.21 | 5.27E-06 | 13.55 (2.91)           | CHD6         | CHD6         |
| rs4603841   | 20  | 40169949        | G   | A  | 0.21 | 5.27E-06 | 13.55 (2.91)           | CHD6         | CHD6         |
| rs6102461   | 20  | 40181975        | C   | A  | 0.21 | 5.27E-06 | 13.54 (2.91)           | CHD6         | CHD6         |
| rs6102462   | 20  | 40182025        | G   | A  | 0.21 | 5.28E-06 | 13.54 (2.91)           | CHD6         | CHD6         |
| rs8115560   | 20  | 40152176        | T   | A  | 0.21 | 5.35E-06 | 13.53 (2.91)           | CHD6         | CHD6         |
| rs6102448   | 20  | 40152483        | G   | A  | 0.21 | 5.35E-06 | 13.53 (2.91)           | CHD6         | CHD6         |
| rs6129858   | 20  | 40146939        | G   | A  | 0.21 | 5.36E-06 | 13.53 (2.91)           | CHD6         | CHD6         |
| rs75175086  | 3   | 71394227        | T   | C  | 0.23 | 6.89E-06 | 13.86 (3.01)           | FOXP1        | FOXP1        |
| rs766838    | 7   | 26030166        | T   | C  | 0.48 | 7.17E-06 | -10.92 (2.38)          | LOC105375199 | MIR148A      |
| rs6461903   | 7   | 26033817        | A   | G  | 0.48 | 7.30E-06 | -10.93 (2.38)          | LOC105375199 | MIR148A      |
| rs4719845   | 7   | 26034208        | G   | A  | 0.48 | 7.32E-06 | -10.93 (2.38)          | LOC105375199 | MIR148A      |
| rs2893234   | 7   | 26034599        | T   | G  | 0.48 | 7.34E-06 | -10.93 (2.38)          | LOC105375199 | MIR148A      |
| rs55792885  | 8   | 129165079       | G   | A  | 0.15 | 7.47E-06 | 16.41 (3.58)           | NA           | MIR1208      |
| rs80110011  | 3   | 71391227        | G   | A  | 0.23 | 7.87E-06 | 13.74 (3.01)           | FOXP1        | FOXP1        |
| rs146290797 | 3   | 71396926        | C   | T  | 0.23 | 8.37E-06 | 13.85 (3.04)           | FOXP1        | FOXP1        |
| rs6978844   | 7   | 26026776        | G   | A  | 0.48 | 8.49E-06 | -10.86 (2.39)          | LOC105375199 | MIR148A      |
| rs2866742   | 20  | 40163455        | G   | A  | 0.36 | 8.52E-06 | 11.77 (2.59)           | CHD6         | CHD6         |
| rs4812521   | 20  | 40159872        | T   | C  | 0.36 | 8.52E-06 | 11.77 (2.59)           | CHD6         | CHD6         |
| rs4812522   | 20  | 40164044        | T   | C  | 0.36 | 8.52E-06 | 11.77 (2.59)           | CHD6         | CHD6         |
| rs11481321  | 20  | 40155254        | G   | GA | 0.36 | 8.57E-06 | 11.76 (2.59)           | CHD6         | CHD6         |
| rs6964512   | 7   | 26026149        | G   | T  | 0.48 | 8.82E-06 | -10.85 (2.39)          | LOC105375199 | MIR148A      |
| rs8056316   | 16  | 7681644         | G   | C  | 0.13 | 8.87E-06 | -18.03 (3.97)          | RBFOX1       | RBFOX1       |
| rs78500097  | 3   | 71395329        | G   | A  | 0.23 | 8.91E-06 | 13.75 (3.03)           | FOXP1        | FOXP1        |
| rs11086806  | 20  | 40146737        | T   | G  | 0.36 | 8.93E-06 | 11.74 (2.59)           | CHD6         | CHD6         |
| rs4812520   | 20  | 40150484        | A   | C  | 0.36 | 9.06E-06 | 11.78 (2.60)           | CHD6         | CHD6         |
| rs6461900   | 7   | 26024687        | A   | T  | 0.48 | 9.42E-06 | -10.82 (2.39)          | LOC105375199 | MIR148A      |
| rs4719848   | 7   | 26035630        | T   | G  | 0.48 | 9.75E-06 | -10.87 (2.40)          | LOC105375199 | MIR148A      |

<sup>‡</sup> Regression coefficient of the minor allele and standard error.

MAF, minor allele frequency
