# Supplementary material for: Genetic variants at the RTP4/MASP1 locus are associated with fatigue in Scandinavian patients with primary Sjögren’s syndrome
Source: HighWire-hosted journal article supplement (doi:10.1136/rmdopen-2021-001832), 2021-12-01
Supplement: rmdopen-2021-001832supp004_data_supplement.pdf [file rmdopen-2021-001832supp004_data_supplement.pdf]

**Supplementary Table S3** Genetic variants associated with the level of fatigue at suggestive significance ( $p < 1.0E-05$ ) in patients with primary Sjögren's syndrome in the Swedish cohort (n=138)

| SNP ID            | Chr      | Position (hg19)  | A1        | A2       | MAF         | P-value         | Beta (SE) <sup>‡</sup> | Gene symbol     | Closest gene       |
|-------------------|----------|------------------|-----------|----------|-------------|-----------------|------------------------|-----------------|--------------------|
| <b>rs10039856</b> | <b>5</b> | <b>142252549</b> | <b>C</b>  | <b>T</b> | <b>0.07</b> | <b>9.39E-09</b> | <b>-32.84 (5.29)</b>   | <b>ARHGAP26</b> | <b>ARHGAP26</b>    |
| rs9664595         | 10       | 2561902          | T         | C        | 0.2         | 7.63E-07        | -16.89 (3.27)          | LOC105376350    | LOC105376350       |
| rs9665559         | 10       | 2562837          | G         | T        | 0.2         | 7.66E-07        | -16.88 (3.27)          | LOC105376350    | LOC105376350       |
| rs60344347        | 3        | 187072951        | CCT<br>CT | C        | 0.23        | 1.07E-06        | -14.96 (2.94)          | NA              | RTP4/MASPI         |
| rs1985269         | 3        | 187072267        | C         | T        | 0.23        | 1.08E-06        | -14.95 (2.94)          | NA              | RTP4/MASPI         |
| rs7611640         | 3        | 187078402        | G         | A        | 0.23        | 1.08E-06        | -14.95 (2.94)          | NA              | RTP4/MASPI         |
| rs73182503        | 3        | 187081659        | A         | G        | 0.23        | 1.09E-06        | -14.95 (2.94)          | NA              | RTP4/MASPI         |
| rs7626469         | 3        | 187082771        | C         | G        | 0.23        | 1.09E-06        | -14.96 (2.94)          | NA              | RTP4/MASPI         |
| rs73197561        | 3        | 187066709        | A         | G        | 0.23        | 1.28E-06        | -15.00 (2.96)          | NA              | RTP4/MASPI         |
| rs7594173         | 2        | 32900330         | A         | G        | 0.22        | 1.38E-06        | 17.15 (3.40)           | TTC27           | TTC27              |
| rs73197558        | 3        | 187066579        | G         | T        | 0.23        | 1.50E-06        | -14.92 (2.96)          | NA              | RTP4/MASPI         |
| rs73197560        | 3        | 187066603        | T         | A        | 0.23        | 1.65E-06        | -14.86 (2.97)          | NA              | RTP4/MASPI         |
| rs2630361         | 12       | 51335587         | A         | T        | 0.42        | 3.15E-06        | 13.03 (2.68)           | HIGD1C          | HIGD1C/<br>SLC11A2 |
| rs2554863         | 12       | 51335589         | G         | C        | 0.42        | 3.15E-06        | 13.03 (2.68)           | HIGD1C          | HIGD1C/<br>SLC11A2 |
| rs10783409        | 12       | 51336363         | A         | G        | 0.41        | 3.64E-06        | 13.03 (2.71)           | HIGD1C          | HIGD1C<br>/SLC11A2 |
| rs2630370         | 12       | 51337257         | A         | G        | 0.41        | 3.64E-06        | 13.03 (2.71)           | HIGD1C          | HIGD1C/<br>SLC11A2 |
| rs2630371         | 12       | 51341632         | C         | T        | 0.41        | 3.65E-06        | 13.03 (2.71)           | HIGD1C          | HIGD1C/<br>SLC11A2 |
| rs829015          | 12       | 51344443         | T         | C        | 0.41        | 3.65E-06        | 13.03 (2.71)           | HIGD1C          | HIGD1C/<br>SLC11A2 |
| rs17094837        | 10       | 118248358        | T         | A        | 0.08        | 4.49E-06        | -25.10 (5.28)          | NA              | PNLIPRP3           |
| rs7895539         | 10       | 118248572        | A         | C        | 0.08        | 4.49E-06        | -25.10 (5.28)          | NA              | PNLIPRP3           |
| rs56347627        | 10       | 118248730        | G         | C        | 0.08        | 4.62E-06        | -25.13 (5.28)          | NA              | PNLIPRP3           |
| rs146542175       | 10       | 118244960        | G         | A        | 0.08        | 4.70E-06        | -25.03 (5.28)          | NA              | PNLIPRP3           |
| rs141179670       | 10       | 118245117        | C         | T        | 0.08        | 4.70E-06        | -25.03 (5.28)          | NA              | PNLIPRP3           |
| rs4751973         | 10       | 118243975        | C         | T        | 0.08        | 4.71E-06        | -25.03 (5.28)          | NA              | PNLIPRP3           |
| rs12569863        | 10       | 118243242        | C         | T        | 0.08        | 4.73E-06        | -25.03 (5.28)          | NA              | PNLIPRP3           |
| rs4751972         | 10       | 118241933        | G         | A        | 0.08        | 4.76E-06        | -25.01 (5.28)          | NA              | PNLIPRP3           |
| rs1544373         | 7        | 19241953         | G         | A        | 0.07        | 4.86E-06        | -26.15 (5.52)          | NA              | FERD3L             |
| rs76706280        | 2        | 32898214         | A         | G        | 0.21        | 4.87E-06        | 16.35 (3.44)           | TTC27           | TTC27              |
| rs224448          | 12       | 51391334         | G         | C        | 0.42        | 5.48E-06        | -12.87 (2.72)          | SLC11A2         | HIGD1C/<br>SLC11A2 |
| rs1549827         | 10       | 118188503        | T         | A        | 0.1         | 5.72E-06        | 20.72 (4.40)           | NA              | PNLIPRP3           |
| rs66695429        | 6        | 124718790        | TA        | T        | 0.06        | 5.75E-06        | -27.09 (5.77)          | NKAIN2          | NKAIN2             |
| rs72509439        | 10       | 118195787        | AT        | A        | 0.1         | 5.95E-06        | 20.83 (4.43)           | NA              | PNLIPRP3           |
| rs144072128       | 6        | 124729790        | T         | G        | 0.05        | 6.13E-06        | -28.57 (6.13)          | NKAIN2          | NKAIN2             |
| 6:124729823       | 6        | 124729823        | T         | C        | 0.05        | 6.13E-06        | -28.57 (6.13)          | NKAIN2          | NKAIN2             |
| rs182746228       | 6        | 124729824        | G         | A        | 0.05        | 6.13E-06        | -28.57 (6.13)          | NKAIN2          | NKAIN2             |
| rs11251287        | 10       | 2558821          | C         | T        | 0.23        | 6.16E-06        | -15.03 (3.20)          | LOC105376350    | LOC105376350       |
| rs9665581         | 10       | 2559558          | C         | A        | 0.23        | 6.16E-06        | -15.03 (3.20)          | LOC105376350    | LOC105376350       |
| rs10885930        | 10       | 118187936        | C         | A        | 0.1         | 6.17E-06        | 20.67 (4.41)           | NA              | PNLIPRP3           |
| rs60988615        | 10       | 2555434          | TGA<br>G  | T        | 0.23        | 6.19E-06        | -15.03 (3.20)          | LOC105376350    | LOC105376350       |
| rs17012060        | 2        | 32905437         | A         | G        | 0.2         | 6.24E-06        | 16.30 (3.47)           | TTC27           | TTC27              |
| rs713252          | 10       | 118185230        | C         | T        | 0.1         | 6.34E-06        | 20.63 (4.40)           | NA              | PNLIPRP3           |
| rs10903786        | 10       | 2555629          | G         | A        | 0.23        | 6.45E-06        | -15.03 (3.21)          | LOC105376350    | LOC105376350       |
| rs62436341        | 6        | 124754498        | C         | A        | 0.06        | 6.51E-06        | -24.70 (5.22)          | NKAIN2          | NKAIN2             |
| rs17051780        | 6        | 124710492        | T         | C        | 0.06        | 6.74E-06        | -27.72 (5.94)          | NKAIN2          | NKAIN2             |

|                |    |           |     |     |      |          |               |              |                    |
|----------------|----|-----------|-----|-----|------|----------|---------------|--------------|--------------------|
| rs9491153      | 6  | 124711068 | G   | C   | 0.06 | 6.74E-06 | -27.72 (5.94) | NKAIN2       | NKAIN2             |
| rs1322582      | 6  | 124716314 | A   | G   | 0.06 | 6.74E-06 | -27.72 (5.94) | NKAIN2       | NKAIN2             |
| rs73770477     | 6  | 124716570 | A   | C   | 0.06 | 6.74E-06 | -27.72 (5.94) | NKAIN2       | NKAIN2             |
| rs62436275     | 6  | 124716766 | T   | C   | 0.06 | 6.74E-06 | -27.72 (5.94) | NKAIN2       | NKAIN2             |
| chr6:124718792 | 6  | 124718792 | A   | T   | 0.06 | 6.75E-06 | -27.72 (5.94) | NKAIN2       | NKAIN2             |
| rs9482544      | 6  | 124718806 | A   | G   | 0.06 | 6.75E-06 | -27.72 (5.94) | NKAIN2       | NKAIN2             |
| rs62436281     | 6  | 124719277 | T   | C   | 0.06 | 6.75E-06 | -27.72 (5.94) | NKAIN2       | NKAIN2             |
| rs4259762      | 10 | 2556981   | G   | A   | 0.23 | 6.85E-06 | -15.00 (3.21) | LOC105376350 | LOC105376350       |
| rs62436338     | 6  | 124745833 | G   | A   | 0.06 | 6.86E-06 | -24.95 (5.32) | NKAIN2       | NKAIN2             |
| rs118002838    | 6  | 124746721 | A   | G   | 0.06 | 6.88E-06 | -24.95 (5.32) | NKAIN2       | NKAIN2             |
| rs6903115      | 6  | 124724198 | A   | G   | 0.06 | 6.93E-06 | -27.72 (5.94) | NKAIN2       | NKAIN2             |
| rs62436301     | 6  | 124727649 | T   | C   | 0.06 | 7.00E-06 | -27.72 (5.94) | NKAIN2       | NKAIN2             |
| rs141120443    | 6  | 124731892 | A   | G   | 0.06 | 7.01E-06 | -27.72 (5.94) | NKAIN2       | NKAIN2             |
| rs142837807    | 6  | 124732726 | G   | T   | 0.06 | 7.01E-06 | -27.72 (5.94) | NKAIN2       | NKAIN2             |
| rs141710474    | 6  | 124732850 | A   | G   | 0.06 | 7.01E-06 | -27.72 (5.94) | NKAIN2       | NKAIN2             |
| rs139603834    | 6  | 124733088 | C   | G   | 0.06 | 7.01E-06 | -27.72 (5.94) | NKAIN2       | NKAIN2             |
| rs62436311     | 6  | 124733166 | T   | G   | 0.06 | 7.01E-06 | -27.72 (5.94) | NKAIN2       | NKAIN2             |
| rs62436313     | 6  | 124733321 | A   | G   | 0.06 | 7.01E-06 | -27.72 (5.94) | NKAIN2       | NKAIN2             |
| rs62436314     | 6  | 124733340 | C   | T   | 0.06 | 7.01E-06 | -27.72 (5.94) | NKAIN2       | NKAIN2             |
| rs62436316     | 6  | 124734122 | G   | A   | 0.06 | 7.02E-06 | -27.72 (5.94) | NKAIN2       | NKAIN2             |
| rs62436317     | 6  | 124734451 | C   | A   | 0.06 | 7.02E-06 | -27.72 (5.94) | NKAIN2       | NKAIN2             |
| rs9482551      | 6  | 124734588 | C   | T   | 0.06 | 7.02E-06 | -27.72 (5.94) | NKAIN2       | NKAIN2             |
| rs62436318     | 6  | 124735898 | C   | G   | 0.06 | 7.02E-06 | -27.72 (5.94) | NKAIN2       | NKAIN2             |
| rs62436320     | 6  | 124736233 | T   | G   | 0.06 | 7.02E-06 | -27.72 (5.94) | NKAIN2       | NKAIN2             |
| rs200707930    | 6  | 124739269 | C   | CA  | 0.06 | 7.02E-06 | -27.72 (5.94) | NKAIN2       | NKAIN2             |
| rs140590728    | 6  | 124733767 | G   | A   | 0.06 | 7.03E-06 | -27.72 (5.94) | NKAIN2       | NKAIN2             |
| rs62436321     | 6  | 124739581 | C   | G   | 0.06 | 7.03E-06 | -27.72 (5.94) | NKAIN2       | NKAIN2             |
| rs62436339     | 6  | 124748269 | T   | C   | 0.06 | 7.20E-06 | -24.93 (5.32) | NKAIN2       | NKAIN2             |
| rs62436340     | 6  | 124749990 | C   | T   | 0.07 | 7.25E-06 | -24.18 (5.15) | NKAIN2       | NKAIN2             |
| rs9491175      | 6  | 124748686 | C   | T   | 0.06 | 7.28E-06 | -24.93 (5.33) | NKAIN2       | NKAIN2             |
| rs919613       | 10 | 118179575 | T   | A   | 0.1  | 7.35E-06 | 20.56 (4.41)  | NA           | PNLIPRP3           |
| rs201785350    | 6  | 124735167 | GT  | G   | 0.06 | 7.42E-06 | -27.66 (5.95) | NKAIN2       | NKAIN2             |
| rs12262444     | 10 | 2557018   | C   | A   | 0.23 | 7.61E-06 | -14.94 (3.22) | LOC105376350 | LOC105376350       |
| rs62436344     | 6  | 124758796 | A   | G   | 0.06 | 7.67E-06 | -24.67 (5.24) | NKAIN2       | NKAIN2             |
| rs4768947      | 12 | 51362161  | T   | C   | 0.42 | 7.71E-06 | 12.64 (2.72)  | SLC11A2      | HIGD1C/<br>SLC11A2 |
| chr12:51404679 | 12 | 51404679  | CCT | TCT | 0.42 | 7.75E-06 | -12.65 (2.73) | SLC11A2      | HIGD1C/<br>SLC11A2 |
| rs1095999      | 12 | 51367350  | A   | T   | 0.42 | 7.81E-06 | 12.64 (2.73)  | SLC11A2      | HIGD1C/<br>SLC11A2 |
| rs829025       | 12 | 51371797  | A   | G   | 0.42 | 7.81E-06 | -12.64 (2.73) | SLC11A2      | HIGD1C/<br>SLC11A2 |
| rs706805       | 12 | 51383787  | A   | G   | 0.42 | 7.81E-06 | -12.64 (2.73) | SLC11A2      | HIGD1C/<br>SLC11A2 |
| rs1632791      | 12 | 51386872  | C   | T   | 0.42 | 7.81E-06 | -12.64 (2.73) | SLC11A2      | HIGD1C/<br>SLC11A2 |
| rs11169657     | 12 | 51388125  | C   | T   | 0.42 | 7.81E-06 | -12.64 (2.73) | SLC11A2      | HIGD1C/<br>SLC11A2 |
| rs7977740      | 12 | 51401218  | A   | G   | 0.42 | 7.81E-06 | -12.64 (2.73) | SLC11A2      | HIGD1C/<br>SLC11A2 |
| rs427020       | 12 | 51404467  | C   | T   | 0.42 | 7.82E-06 | -12.64 (2.73) | SLC11A2      | HIGD1C/<br>SLC11A2 |
| rs224572       | 12 | 51416520  | T   | C   | 0.42 | 7.82E-06 | -12.64 (2.73) | SLC11A2      | HIGD1C/<br>SLC11A2 |
| rs62436335     | 6  | 124743902 | T   | C   | 0.06 | 8.01E-06 | -27.67 (5.95) | NKAIN2       | NKAIN2             |
| rs12424509     | 12 | 51422326  | T   | A   | 0.42 | 8.08E-06 | -12.62 (2.73) | SLC11A2      | HIGD1C/<br>SLC11A2 |
| rs62436337     | 6  | 124744746 | A   | G   | 0.06 | 8.11E-06 | -27.68 (5.95) | NKAIN2       | NKAIN2             |

---

|                |   |           |   |   |      |          |               |               |               |
|----------------|---|-----------|---|---|------|----------|---------------|---------------|---------------|
| rs80082716     | 6 | 124744811 | G | A | 0.06 | 8.11E-06 | -27.68 (5.95) | <i>NKAIN2</i> | <i>NKAIN2</i> |
| chr6:124760516 | 6 | 124760516 | T | A | 0.06 | 8.22E-06 | -24.66 (5.26) | <i>NKAIN2</i> | <i>NKAIN2</i> |
| rs62436273     | 6 | 124715083 | A | G | 0.06 | 8.35E-06 | -27.62 (5.96) | <i>NKAIN2</i> | <i>NKAIN2</i> |
| rs62436274     | 6 | 124715086 | C | G | 0.06 | 8.35E-06 | -27.62 (5.96) | <i>NKAIN2</i> | <i>NKAIN2</i> |

---

‡ Regression coefficient of the minor allele and standard error.

Variant exceeding genome-wide significance ( $p < 5.0E-08$ ) is marked in bold.

MAF, minor allele frequency
