# Supplementary material for: Genetic variants at the RTP4/MASP1 locus are associated with fatigue in Scandinavian patients with primary Sjögren’s syndrome
Source: HighWire-hosted journal article supplement (doi:10.1136/rmdopen-2021-001832), 2021-12-01
Supplement: rmdopen-2021-001832supp005_data_supplement.pdf [file rmdopen-2021-001832supp005_data_supplement.pdf]

**Supplementary Table S4** Genetic variants associated with the level of fatigue at suggestive significance ( $p < 1.0E-05$ ) in patients with primary Sjögren's syndrome in the UK cohort (n=128)

| SNP ID      | Chr | Position (hg19) | A1                         | A2 | MAF  | P-value  | Beta (SE) <sup>‡</sup> | Gene symbol  | Closest gene |
|-------------|-----|-----------------|----------------------------|----|------|----------|------------------------|--------------|--------------|
| rs12679528  | 8   | 15566164        | G                          | A  | 0.41 | 1.20E-07 | 17.95 (3.21)           | TUSC3        | TUSC3        |
| rs2111755   | 8   | 15562357        | G                          | C  | 0.39 | 2.50E-07 | 17.35 (3.20)           | TUSC3        | TUSC3        |
| rs5889597   | 8   | 15562455        | TAAA                       | T  | 0.39 | 2.72E-07 | 17.16 (3.17)           | TUSC3        | TUSC3        |
| rs1421259   | 8   | 15562672        | A                          | G  | 0.39 | 2.72E-07 | 17.16 (3.17)           | TUSC3        | TUSC3        |
| rs4240180   | 8   | 15555541        | C                          | T  | 0.27 | 3.45E-07 | 20.11 (3.75)           | TUSC3        | TUSC3        |
| rs4379450   | 8   | 15555791        | A                          | G  | 0.27 | 3.45E-07 | 20.11 (3.75)           | TUSC3        | TUSC3        |
| rs4322010   | 8   | 15555800        | T                          | C  | 0.27 | 3.45E-07 | 20.11 (3.75)           | TUSC3        | TUSC3        |
| rs13273264  | 8   | 15563463        | C                          | T  | 0.39 | 3.57E-07 | 17.08 (3.19)           | TUSC3        | TUSC3        |
| rs13275229  | 8   | 15563739        | A                          | G  | 0.39 | 3.57E-07 | 17.08 (3.19)           | TUSC3        | TUSC3        |
| rs4520084   | 7   | 147908658       | T                          | C  | 0.50 | 3.61E-07 | 16.98 (3.17)           | CNTNAP2      | CNTNAP2      |
| rs13275202  | 8   | 15563714        | A                          | G  | 0.40 | 3.65E-07 | 17.15 (3.20)           | TUSC3        | TUSC3        |
| rs13272655  | 8   | 15563933        | G                          | T  | 0.40 | 3.65E-07 | 17.15 (3.20)           | TUSC3        | TUSC3        |
| rs12545813  | 8   | 15564321        | G                          | A  | 0.40 | 3.65E-07 | 17.15 (3.20)           | TUSC3        | TUSC3        |
| rs13265882  | 8   | 15565257        | T                          | C  | 0.40 | 3.65E-07 | 17.15 (3.20)           | TUSC3        | TUSC3        |
| rs13266483  | 8   | 15565457        | T                          | A  | 0.40 | 3.65E-07 | 17.15 (3.20)           | TUSC3        | TUSC3        |
| rs10074116  | 5   | 91786204        | A                          | G  | 0.07 | 5.85E-07 | -35.36 (6.66)          | LOC105379080 | LOC105379080 |
| rs6861154   | 5   | 91787760        | C                          | A  | 0.07 | 6.03E-07 | -35.07 (6.66)          | LOC105379080 | LOC105379080 |
| rs72777101  | 5   | 91784726        | A                          | G  | 0.07 | 6.48E-07 | -35.24 (6.68)          | LOC105379080 | LOC105379080 |
| rs10075974  | 5   | 91780657        | A                          | G  | 0.07 | 8.99E-07 | -34.76 (6.72)          | LOC105379080 | LOC105379080 |
| rs1018365   | 22  | 33679425        | G                          | C  | 0.09 | 1.11E-06 | -29.54 (5.81)          | LARGE1       | LARGE1       |
| rs150429125 | 5   | 91777642        | TA                         | T  | 0.07 | 1.13E-06 | -34.16 (6.74)          | LOC105379080 | LOC105379080 |
| rs2604340   | 8   | 15594312        | A                          | G  | 0.27 | 1.16E-06 | 19.27 (3.78)           | TUSC3        | TUSC3        |
| rs10068591  | 5   | 91775806        | C                          | A  | 0.07 | 1.22E-06 | -34.02 (6.74)          | LOC105379080 | LOC105379080 |
| rs144557845 | 5   | 91775404        | T                          | A  | 0.07 | 1.24E-06 | -33.99 (6.74)          | LOC105379080 | LOC105379080 |
| rs13258543  | 8   | 15556834        | A                          | T  | 0.33 | 1.38E-06 | 17.82 (3.52)           | TUSC3        | TUSC3        |
| rs7285350   | 22  | 33678629        | T                          | G  | 0.09 | 1.67E-06 | -28.60 (5.71)          | LARGE1       | LARGE1       |
| rs145200158 | 5   | 91768548        | A                          | AT | 0.07 | 1.68E-06 | -33.26 (6.68)          | LOC105379080 | LOC105379080 |
| rs147272260 | 22  | 33678095        | C                          | T  | 0.09 | 1.68E-06 | -28.60 (5.71)          | LARGE1       | LARGE1       |
| rs140964403 | 22  | 33678112        | C                          | T  | 0.09 | 1.68E-06 | -28.60 (5.71)          | LARGE1       | LARGE1       |
| rs370181045 | 22  | 33678332        | AAAA<br>ACAA<br>ACAA<br>AC | A  | 0.09 | 1.68E-06 | -28.60 (5.71)          | LARGE1       | LARGE1       |
| rs7284378   | 22  | 33678520        | G                          | C  | 0.09 | 1.68E-06 | -28.60 (5.71)          | LARGE1       | LARGE1       |
| rs145710420 | 22  | 33672271        | TTTT<br>G                  | T  | 0.09 | 1.69E-06 | -28.59 (5.71)          | LARGE1       | LARGE1       |
| rs79710384  | 22  | 33673814        | G                          | A  | 0.09 | 1.69E-06 | -28.60 (5.71)          | LARGE1       | LARGE1       |
| rs76913609  | 22  | 33674479        | A                          | C  | 0.09 | 1.69E-06 | -28.60 (5.71)          | LARGE1       | LARGE1       |
| rs78324545  | 22  | 33675752        | A                          | G  | 0.09 | 1.69E-06 | -28.60 (5.71)          | LARGE1       | LARGE1       |
| rs78317122  | 22  | 33675853        | A                          | G  | 0.09 | 1.69E-06 | -28.60 (5.71)          | LARGE1       | LARGE1       |
| rs5998839   | 22  | 33676283        | T                          | C  | 0.09 | 1.69E-06 | -28.59 (5.71)          | LARGE1       | LARGE1       |
| rs17795296  | 22  | 33677816        | T                          | G  | 0.09 | 1.69E-06 | -28.60 (5.71)          | LARGE1       | LARGE1       |
| rs41282597  | 22  | 33670679        | G                          | A  | 0.09 | 1.70E-06 | -28.59 (5.71)          | LARGE1       | LARGE1       |
| rs10041199  | 5   | 91765897        | A                          | T  | 0.07 | 1.72E-06 | -33.19 (6.68)          | LOC105379080 | LOC105379080 |
| rs148762098 | 22  | 33668923        | G                          | GA | 0.09 | 1.73E-06 | -28.60 (5.71)          | LARGE1       | LARGE1       |
| rs149577011 | 22  | 33668470        | GAAC                       | G  | 0.09 | 1.74E-06 | -28.45 (5.67)          | LARGE1       | LARGE1       |
| rs9314231   | 5   | 91764149        | G                          | T  | 0.07 | 1.76E-06 | -33.12 (6.67)          | LOC105379080 | LOC105379080 |
| rs10052520  | 5   | 91760661        | T                          | A  | 0.07 | 1.88E-06 | -32.93 (6.64)          | LOC105379080 | LOC105379080 |
| rs10054799  | 5   | 91755102        | A                          | T  | 0.07 | 2.14E-06 | -32.51 (6.55)          | LOC105379080 | LOC105379080 |
| rs72777081  | 5   | 91745264        | C                          | G  | 0.07 | 2.15E-06 | -32.48 (6.55)          | LOC105379080 | LOC105379080 |
| rs28669887  | 5   | 91748254        | C                          | T  | 0.07 | 2.15E-06 | -32.48 (6.55)          | LOC105379080 | LOC105379080 |

|                |    |           |   |             |      |          |               |              |              |
|----------------|----|-----------|---|-------------|------|----------|---------------|--------------|--------------|
| rs10053665     | 5  | 91752084  | G | A           | 0.07 | 2.15E-06 | -32.49 (6.55) | LOC105379080 | LOC105379080 |
| rs10059030     | 5  | 91733747  | T | G           | 0.07 | 2.16E-06 | -32.46 (6.55) | LOC105379080 | LOC105379080 |
| rs10055515     | 5  | 91739393  | C | T           | 0.07 | 2.16E-06 | -32.47 (6.55) | LOC105379080 | LOC105379080 |
| rs10055632     | 5  | 91739565  | C | T           | 0.07 | 2.16E-06 | -32.47 (6.55) | LOC105379080 | LOC105379080 |
| rs10041056     | 5  | 91718060  | T | C           | 0.07 | 2.22E-06 | -32.23 (6.52) | LOC105379080 | LOC105379080 |
| chr5:91752216  | 5  | 91752216  | G | A           | 0.07 | 2.57E-06 | -32 (6.53)    | LOC105379080 | LOC105379080 |
| rs2543145      | 8  | 15593659  | T | A           | 0.27 | 2.80E-06 | 18.66 (3.81)  | TUSC3        | TUSC3        |
| rs1054083      | 17 | 908529    | A | G           | 0.12 | 3.01E-06 | 23.14 (4.75)  | ABR          | ABR          |
| rs6993547      | 8  | 68973700  | G | C           | 0.19 | 3.60E-06 | -19.27 (4)    | PREX2        | PREX2        |
| rs13278290     | 8  | 15560370  | C | T           | 0.33 | 3.78E-06 | 17.17 (3.56)  | TUSC3        | TUSC3        |
| rs7005752      | 8  | 68969350  | G | A           | 0.18 | 3.96E-06 | -19.71 (4.1)  | PREX2        | PREX2        |
| rs7009725      | 8  | 68969463  | G | A           | 0.18 | 3.96E-06 | -19.71 (4.1)  | PREX2        | PREX2        |
| rs7009954      | 8  | 68969814  | C | T           | 0.18 | 3.96E-06 | -19.71 (4.1)  | PREX2        | PREX2        |
| rs7009963      | 8  | 68969882  | A | C           | 0.18 | 3.96E-06 | -19.71 (4.1)  | PREX2        | PREX2        |
| rs7010514      | 8  | 68969951  | G | A           | 0.18 | 3.96E-06 | -19.71 (4.1)  | PREX2        | PREX2        |
| rs1897874      | 8  | 68970343  | G | T           | 0.18 | 3.96E-06 | -19.71 (4.1)  | PREX2        | PREX2        |
| rs1897875      | 8  | 68970492  | A | T           | 0.18 | 3.96E-06 | -19.71 (4.1)  | PREX2        | PREX2        |
| rs17445951     | 8  | 68974103  | G | A           | 0.18 | 3.96E-06 | -19.71 (4.1)  | PREX2        | PREX2        |
| rs17445916     | 8  | 68974008  | G | A           | 0.18 | 3.97E-06 | -19.71 (4.1)  | PREX2        | PREX2        |
| rs1897876      | 8  | 68970772  | T | G           | 0.18 | 4.00E-06 | -19.71 (4.1)  | PREX2        | PREX2        |
| chr22:33674547 | 22 | 33674547  | A | T           | 0.09 | 4.41E-06 | -27.26 (5.71) | LARGE1       | LARGE1       |
| rs1477207      | 8  | 15557421  | A | G           | 0.33 | 4.44E-06 | 17.06 (3.57)  | TUSC3        | TUSC3        |
| rs6694119      | 1  | 90660848  | A | G           | 0.30 | 4.67E-06 | -17.34 (3.63) | NA           | LOC105378849 |
| rs7591479      | 2  | 159039836 | A | T           | 0.36 | 5.00E-06 | -14.41 (3.03) | CCDC148      | CCDC148      |
| rs16992034     | 22 | 33669492  | G | C           | 0.09 | 5.17E-06 | -26.93 (5.67) | LARGE1       | LARGE1       |
| rs7592105      | 2  | 159047406 | G | A           | 0.36 | 5.51E-06 | -14.22 (3)    | CCDC148      | CCDC148      |
| rs7771959      | 6  | 91517533  | A | G           | 0.48 | 5.68E-06 | -15.6 (3.3)   | LOC107986623 | LOC107986623 |
| rs4075465      | 16 | 83148925  | G | A           | 0.45 | 6.31E-06 | 16.36 (3.47)  | GPC5         | GPC5         |
| rs7203162      | 16 | 83148282  | G | A           | 0.45 | 6.86E-06 | 16.22 (3.47)  | GPC5         | GPC5         |
| rs17722172     | 22 | 33670584  | G | A           | 0.09 | 7.45E-06 | -26.48 (5.68) | LARGE1       | LARGE1       |
| rs1190234      | 14 | 103398706 | G | A           | 0.15 | 7.54E-06 | -20.4 (4.38)  | GPC5         | GPC5         |
| rs7750014      | 6  | 91513368  | A | T           | 0.48 | 7.86E-06 | -15.31 (3.3)  | LOC107986623 | LOC107986623 |
| rs35227786     | 6  | 91513690  | A | AT          | 0.48 | 8.39E-06 | -15.26 (3.3)  | LOC107986623 | LOC107986623 |
| rs6492563      | 13 | 92607211  | T | A           | 0.37 | 8.57E-06 | 16.88 (3.65)  | GPC5         | GPC5         |
| chr6:26033809  | 6  | 26033809  | T | TAAG<br>AAG | 0.48 | 8.65E-06 | 15.96 (3.45)  | NA           | H2AC4        |
| rs11384857     | 13 | 92606807  | T | TG          | 0.37 | 8.75E-06 | 16.86 (3.65)  | GPC5         | GPC5         |
| rs1553484      | 6  | 91507934  | A | G           | 0.37 | 9.04E-06 | -16.02 (3.47) | LOC107986623 | LOC107986623 |
| rs9301765      | 13 | 92614270  | C | G           | 0.37 | 9.10E-06 | 16.79 (3.64)  | GPC5         | GPC5         |
| rs34655502     | 13 | 92611601  | C | CAAA<br>T   | 0.37 | 9.38E-06 | 16.77 (3.64)  | GPC5         | GPC5         |
| rs3906157      | 13 | 92611379  | T | G           | 0.37 | 9.87E-06 | 16.76 (3.64)  | GPC5         | GPC5         |
| rs437276       | 20 | 48233373  | C | A           | 0.25 | 9.89E-06 | -19.53 (4.25) | NA           | LOC105372651 |

‡ Regression coefficient of the minor allele and standard error.

MAF, minor allele frequency
