# Supplementary material for: Genetic variants at the RTP4/MASP1 locus are associated with fatigue in Scandinavian patients with primary Sjögren’s syndrome
Source: HighWire-hosted journal article supplement (doi:10.1136/rmdopen-2021-001832), 2021-12-01
Supplement: rmdopen-2021-001832supp006_data_supplement.pdf [file rmdopen-2021-001832supp006_data_supplement.pdf]

**Supplementary Table S5** Genetic variants associated with the level of fatigue at suggestive significance ( $p < 1.0E-05$ ) in patients with primary Sjögren's syndrome in the USA cohort ( $n=191$ )

| SNP ID      | Chr | Position (hg19) | A1   | A2    | MAF  | P-value  | Beta (SE) <sup>‡</sup> | Gene symbol         | Closest gene                |
|-------------|-----|-----------------|------|-------|------|----------|------------------------|---------------------|-----------------------------|
| rs7605830   | 2   | 167879812       | G    | C     | 0.06 | 2.58E-06 | -28.18 (5.76)          | <i>XIRP2</i>        | <i>XIRP2</i>                |
| rs9879002   | 3   | 59444928        | T    | A     | 0.50 | 4.14E-06 | 12.15 (2.56)           | <i>LOC105377110</i> | <i>LOC105377110</i>         |
| rs9821495   | 3   | 59445128        | A    | T     | 0.50 | 4.14E-06 | 12.14 (2.56)           | <i>LOC105377110</i> | <i>LOC105377110</i>         |
| rs151316276 | 16  | 2934887         | C    | CA    | 0.27 | 4.98E-06 | -13.49 (2.88)          | <i>FLYWCH2</i>      | <i>FLYWCH2</i>              |
| rs10431893  | 16  | 20618902        | G    | A     | 0.06 | 5.19E-06 | -23.98 (5.12)          | NA                  | <i>LOC112267906/ACSM5P1</i> |
| rs7855677   | 9   | 16271083        | G    | A     | 0.17 | 7.28E-06 | -16.10 (3.50)          | <i>C9orf92</i>      | <i>C9orf92</i>              |
| rs140637621 | 1   | 39080347        | GA   | G     | 0.12 | 7.29E-06 | -18.08 (3.91)          | NA                  | <i>LOC100996442</i>         |
| rs11041581  | 11  | 7833008         | G    | A     | 0.07 | 8.15E-06 | 24.37 (5.35)           | NA                  | <i>OR5P2/OR5P3</i>          |
| rs34574317  | 16  | 20614488        | C    | T     | 0.06 | 8.22E-06 | -22.86 (4.99)          | NA                  | <i>LOC112267906/ACSM5P1</i> |
| rs7163945   | 15  | 67231181        | G    | T     | 0.12 | 8.44E-06 | -17.81 (3.9)           | <i>LINC02206</i>    | <i>LINC02206</i>            |
| rs9406604   | 9   | 16273634        | C    | A     | 0.17 | 8.53E-06 | -16.00 (3.50)          | <i>C9orf92</i>      | <i>C9orf92</i>              |
| rs1842820   | 11  | 7831731         | G    | A     | 0.06 | 8.91E-06 | 24.87 (5.42)           | NA                  | <i>OR5P2/OR5P3</i>          |
| rs1842822   | 11  | 7831819         | G    | A     | 0.06 | 8.91E-06 | 24.87 (5.42)           | NA                  | <i>OR5P2/OR5P3</i>          |
| rs1842823   | 11  | 7831882         | C    | T     | 0.06 | 8.91E-06 | 24.87 (5.42)           | NA                  | <i>OR5P2/OR5P3</i>          |
| rs2885149   | 11  | 7832075         | T    | C     | 0.06 | 8.91E-06 | 24.87 (5.42)           | NA                  | <i>OR5P2/OR5P3</i>          |
| rs4310601   | 11  | 7832087         | G    | C     | 0.06 | 8.91E-06 | 24.87 (5.42)           | NA                  | <i>OR5P2/OR5P3</i>          |
| rs11041580  | 11  | 7833007         | T    | C     | 0.06 | 8.91E-06 | 24.87 (5.42)           | NA                  | <i>OR5P2/OR5P3</i>          |
| rs71374818  | 16  | 20610402        | G    | A     | 0.07 | 8.91E-06 | -21.8 (4.79)           | NA                  | <i>LOC112267906/ACSM5P1</i> |
| rs9406603   | 9   | 16270602        | G    | C     | 0.17 | 9.01E-06 | -15.89 (3.49)          | <i>C9orf92</i>      | <i>C9orf92</i>              |
| rs58069103  | 15  | 67231333        | C    | T     | 0.12 | 9.25E-06 | -18.15 (3.99)          | <i>LINC02206</i>    | <i>LINC02206</i>            |
| rs61317848  | 15  | 67231344        | T    | A     | 0.12 | 9.32E-06 | -18.17 (3.99)          | <i>LINC02206</i>    | <i>LINC02206</i>            |
| rs17060647  | 3   | 59415930        | G    | T     | 0.42 | 9.33E-06 | 11.56 (2.54)           | <i>LOC105377110</i> | <i>LOC105377110</i>         |
| rs367600499 | 1   | 39077036        | ACAT | A     | 0.13 | 9.88E-06 | -17.59 (3.88)          | NA                  | <i>LOC100996442</i>         |
| rs35156056  | 19  | 47173993        | A    | AAAAC | 0.42 | 9.88E-06 | 11.52 (2.54)           | <i>DACT3-AS1</i>    | <i>DACT3-AS1</i>            |

<sup>‡</sup>Regression coefficient of the minor allele and standard error.

MAF, minor allele frequency
