# Supplementary material for: Genetic variants at the RTP4/MASP1 locus are associated with fatigue in Scandinavian patients with primary Sjögren’s syndrome
Source: HighWire-hosted journal article supplement (doi:10.1136/rmdopen-2021-001832), 2021-12-01
Supplement: rmdopen-2021-001832supp007_data_supplement.pdf [file rmdopen-2021-001832supp007_data_supplement.pdf]

**Supplementary Table S6** Genetic variants associated with the level of fatigue in patients with primary Sjögren's syndrome at suggestive significance ( $p < 1 \times 10^{-5}$ ) in the meta-analysis of the Norwegian and Swedish cohorts.

| Chr | Variant     | Locus             | Major/minor allele | Norway |          |                   |      | Sweden |          |                   |      | Meta-analysis Norway/Sweden |                   |                |                |
|-----|-------------|-------------------|--------------------|--------|----------|-------------------|------|--------|----------|-------------------|------|-----------------------------|-------------------|----------------|----------------|
|     |             |                   |                    | MAF    | P-value  | Beta <sup>a</sup> | SE   | MAF    | P-value  | Beta <sup>a</sup> | SE   | P-value                     | Beta <sup>a</sup> | Q <sup>b</sup> | I <sup>c</sup> |
| 3   | rs60344347  | <i>RTP4/MASP1</i> | CCTCT/C            | 0.17   | 1.47E-02 | -8.77             | 3.57 | 0.23   | 1.07E-06 | -14.96            | 2.94 | 3.88E-08                    | -12.46            | 0.18           | 44.13          |
| 3   | rs7611640   | <i>RTP4/MASP1</i> | G/A                | 0.17   | 1.48E-02 | -8.77             | 3.57 | 0.23   | 1.08E-06 | -14.95            | 2.94 | 3.92E-08                    | -12.46            | 0.18           | 44.12          |
| 3   | rs1985269   | <i>RTP4/MASP1</i> | C/T                | 0.17   | 1.48E-02 | -8.76             | 3.57 | 0.23   | 1.08E-06 | -14.95            | 2.94 | 3.97E-08                    | -12.45            | 0.18           | 44.28          |
| 3   | rs73182503  | <i>RTP4/MASP1</i> | A/G                | 0.17   | 1.62E-02 | -8.67             | 3.58 | 0.23   | 1.09E-06 | -14.95            | 2.94 | 4.41E-08                    | -12.43            | 0.17           | 45.75          |
| 3   | rs7626469   | <i>RTP4/MASP1</i> | C/G                | 0.17   | 1.62E-02 | -8.67             | 3.58 | 0.23   | 1.09E-06 | -14.96            | 2.94 | 4.41E-08                    | -12.43            | 0.17           | 45.76          |
| 3   | rs73197558  | <i>RTP4/MASP1</i> | G/T                | 0.17   | 2.25E-02 | -8.19             | 3.57 | 0.23   | 1.50E-06 | -14.92            | 2.96 | 9.35E-08                    | -12.17            | 0.15           | 52.63          |
| 3   | rs73197560  | <i>RTP4/MASP1</i> | T/A                | 0.17   | 2.26E-02 | -8.18             | 3.57 | 0.23   | 1.65E-06 | -14.86            | 2.97 | 1.04E-07                    | -12.13            | 0.15           | 51.79          |
| 3   | rs73197561  | <i>RTP4/MASP1</i> | A/G                | 0.17   | 4.02E-02 | -7.33             | 3.56 | 0.23   | 1.28E-06 | -15.00            | 2.96 | 1.83E-07                    | -11.86            | 0.10           | 63.66          |
| 17  | rs75160892  | <i>ERN1</i>       | G/A                | 0.07   | 3.58E-04 | -18.25            | 5.04 | 0.05   | 1.11E-03 | -20.18            | 6.06 | 9.11E-07                    | -19.04            | 0.81           | 0              |
| 17  | rs79773538  | <i>ERN1</i>       | C/T                | 0.07   | 3.58E-04 | -18.25            | 5.04 | 0.05   | 1.11E-03 | -20.18            | 6.06 | 9.14E-07                    | -19.04            | 0.81           | 0              |
| 17  | rs9894399   | <i>ERN1</i>       | A/C                | 0.07   | 3.66E-04 | -18.15            | 5.03 | 0.05   | 1.11E-03 | -20.18            | 6.06 | 9.32E-07                    | -18.98            | 0.80           | 0              |
| 22  | rs133580    | <i>MIR3201</i>    | C/T                | 0.25   | 2.83E-04 | 10.99             | 2.98 | 0.25   | 1.98E-03 | 10.74             | 3.40 | 1.22E-06                    | 10.88             | 0.95           | 0              |
| 10  | rs10994088  | <i>LINC01553</i>  | C/T                | 0.44   | 1.25E-03 | 9.01              | 2.76 | 0.42   | 4.59E-04 | 10.28             | 2.87 | 1.34E-06                    | 9.62              | 0.75           | 0              |
| 10  | rs34250689  | <i>LINC01553</i>  | A/AT               | 0.44   | 1.30E-03 | 8.95              | 2.75 | 0.42   | 4.43E-04 | 10.28             | 2.86 | 1.34E-06                    | 9.59              | 0.74           | 0              |
| 10  | rs4948250   | <i>LINC01553</i>  | T/A                | 0.44   | 1.31E-03 | 8.95              | 2.75 | 0.42   | 4.43E-04 | 10.28             | 2.86 | 1.35E-06                    | 9.59              | 0.74           | 0              |
| 10  | rs5785425   | <i>LINC01553</i>  | CTTTGTTT<br>G/C    | 0.44   | 1.38E-03 | 8.88              | 2.75 | 0.42   | 4.38E-04 | 10.29             | 2.86 | 1.42E-06                    | 9.56              | 0.72           | 0              |
| 10  | rs3851250   | <i>LINC01553</i>  | T/A                | 0.44   | 1.39E-03 | 8.88              | 2.75 | 0.42   | 4.43E-04 | 10.27             | 2.86 | 1.44E-06                    | 9.55              | 0.73           | 0              |
| 10  | rs3843241   | <i>LINC01553</i>  | C/T                | 0.44   | 1.40E-03 | 8.86              | 2.75 | 0.42   | 4.44E-04 | 10.27             | 2.86 | 1.46E-06                    | 9.54              | 0.72           | 0              |
| 10  | rs138623397 | <i>MIR5100</i>    | A/AT               | 0.26   | 1.02E-02 | -7.64             | 2.96 | 0.23   | 3.97E-05 | -12.78            | 3.01 | 1.47E-06                    | -10.16            | 0.22           | 32.53          |
| 10  | rs4301740   | <i>LINC01553</i>  | A/G                | 0.44   | 1.43E-03 | 8.84              | 2.74 | 0.42   | 4.44E-04 | 10.27             | 2.86 | 1.49E-06                    | 9.53              | 0.72           | 0              |
| 10  | rs10821619  | <i>LINC01553</i>  | T/C                | 0.44   | 1.43E-03 | 8.84              | 2.74 | 0.42   | 4.44E-04 | 10.27             | 2.86 | 1.49E-06                    | 9.53              | 0.72           | 0              |
| 10  | rs2053661   | <i>LINC01553</i>  | G/T                | 0.44   | 1.45E-03 | 8.82              | 2.74 | 0.42   | 4.44E-04 | 10.27             | 2.86 | 1.51E-06                    | 9.52              | 0.71           | 0              |
| 10  | rs7078432   | <i>LINC01553</i>  | T/G                | 0.44   | 1.49E-03 | 8.79              | 2.74 | 0.42   | 4.44E-04 | 10.27             | 2.86 | 1.55E-06                    | 9.50              | 0.71           | 0              |
| 10  | rs7078446   | <i>LINC01553</i>  | T/C                | 0.44   | 1.49E-03 | 8.79              | 2.74 | 0.42   | 4.45E-04 | 10.27             | 2.86 | 1.55E-06                    | 9.50              | 0.71           | 0              |
| 10  | rs968626    | <i>LINC01553</i>  | T/C                | 0.44   | 1.50E-03 | 8.78              | 2.74 | 0.42   | 4.42E-04 | 10.28             | 2.86 | 1.56E-06                    | 9.50              | 0.71           | 0              |
| 10  | rs7099657   | <i>LINC01553</i>  | C/T                | 0.44   | 1.54E-03 | 8.76              | 2.74 | 0.42   | 4.36E-04 | 10.29             | 2.86 | 1.59E-06                    | 9.50              | 0.70           | 0              |
| 10  | rs3099373   | <i>LINC01553</i>  | T/G                | 0.44   | 1.54E-03 | -8.76             | 2.74 | 0.42   | 4.35E-04 | -10.30            | 2.86 | 1.59E-06                    | -9.50             | 0.70           | 0              |
| 10  | rs7069483   | <i>LINC01553</i>  | A/G                | 0.44   | 1.55E-03 | -8.76             | 2.74 | 0.42   | 4.34E-04 | -10.30            | 2.86 | 1.59E-06                    | -9.49             | 0.70           | 0              |
| 10  | rs10821620  | <i>LINC01553</i>  | G/T                | 0.44   | 1.55E-03 | 8.76              | 2.74 | 0.42   | 4.34E-04 | 10.30             | 2.86 | 1.59E-06                    | 9.49              | 0.70           | 0              |
| 22  | rs133581    | <i>MIR3201</i>    | A/C                | 0.24   | 3.94E-04 | 10.78             | 3.00 | 0.24   | 2.14E-03 | 10.84             | 3.47 | 1.93E-06                    | 10.81             | 0.99           | 0              |

|    |             |                      |         |      |          |        |      |      |          |        |      |          |        |      |       |
|----|-------------|----------------------|---------|------|----------|--------|------|------|----------|--------|------|----------|--------|------|-------|
| 14 | rs7152199   | <i>NPAS3</i>         | G/A     | 0.30 | 3.15E-04 | 10.32  | 2.82 | 0.29 | 3.00E-03 | 8.94   | 2.96 | 2.28E-06 | 9.66   | 0.74 | 0     |
| 10 | rs142621805 | <i>LINC01553</i>     | GCTAA/G | 0.45 | 2.25E-03 | 8.49   | 2.75 | 0.42 | 4.43E-04 | 10.28  | 2.86 | 2.42E-06 | 9.35   | 0.65 | 0     |
| 10 | rs10994091  | <i>LINC01553</i>     | C/T     | 0.44 | 2.28E-03 | 8.46   | 2.75 | 0.42 | 4.43E-04 | 10.28  | 2.86 | 2.47E-06 | 9.33   | 0.65 | 0     |
| 10 | rs10821618  | <i>LINC01553</i>     | C/T     | 0.44 | 2.39E-03 | 8.42   | 2.74 | 0.42 | 4.57E-04 | 10.27  | 2.87 | 2.68E-06 | 9.30   | 0.64 | 0     |
| 14 | rs8014355   | <i>NPAS3</i>         | G/A     | 0.29 | 2.58E-04 | 10.45  | 2.82 | 0.29 | 4.31E-03 | 8.59   | 2.97 | 2.81E-06 | 9.57   | 0.65 | 0     |
| 4  | rs1433439   | <i>LOC105374397</i>  | G/A     | 0.19 | 2.09E-02 | -7.13  | 3.07 | 0.15 | 2.59E-05 | -15.31 | 3.52 | 4.12E-06 | -10.66 | 0.08 | 67.29 |
| 4  | rs16991737  | <i>LOC105374397</i>  | A/G     | 0.19 | 2.09E-02 | -7.14  | 3.07 | 0.15 | 3.64E-05 | -15.23 | 3.56 | 5.22E-06 | -10.59 | 0.09 | 66.29 |
| 4  | rs60955619  | <i>LOC105374397</i>  | A/C     | 0.19 | 2.09E-02 | -7.14  | 3.07 | 0.15 | 3.64E-05 | -15.23 | 3.56 | 5.23E-06 | -10.59 | 0.09 | 66.28 |
| 4  | rs1119249   | <i>LOC105374397</i>  | T/C     | 0.19 | 2.08E-02 | -7.14  | 3.07 | 0.15 | 3.66E-05 | -15.24 | 3.56 | 5.25E-06 | -10.60 | 0.09 | 66.24 |
| 5  | rs758181    | <i>LINC01184</i>     | A/T     | 0.14 | 2.06E-02 | 9.00   | 3.86 | 0.16 | 8.03E-05 | 15.45  | 3.82 | 6.38E-06 | 12.26  | 0.24 | 29.04 |
| 4  | rs16991755  | <i>LOC105374397</i>  | T/C     | 0.19 | 2.49E-02 | -6.97  | 3.09 | 0.15 | 3.66E-05 | -15.23 | 3.56 | 6.53E-06 | -10.52 | 0.08 | 67.39 |
| 17 | rs76051321  | <i>ERN1</i>          | C/T     | 0.07 | 1.14E-03 | -15.98 | 4.90 | 0.05 | 2.59E-03 | -19.05 | 6.23 | 8.47E-06 | -17.16 | 0.70 | 0     |
| 4  | rs148795887 | <i>RP11-576N17.5</i> | T/C     | 0.17 | 4.78E-02 | 7.45   | 3.74 | 0.18 | 3.57E-05 | 15.36  | 3.60 | 8.61E-06 | 11.55  | 0.13 | 56.86 |
| 5  | rs11428354  | <i>LINC01184</i>     | C/CA    | 0.14 | 1.93E-02 | 9.13   | 3.87 | 0.17 | 1.45E-04 | 14.60  | 3.74 | 8.86E-06 | 11.96  | 0.31 | 3.08  |
| 4  | rs1119248   | <i>LOC105374397</i>  | G/T     | 0.19 | 2.53E-02 | -6.82  | 3.03 | 0.15 | 4.71E-05 | -14.99 | 3.56 | 8.92E-06 | -10.26 | 0.08 | 67.22 |
| 8  | rs10112012  | <i>DEFB1</i>         | C/T     | 0.09 | 8.36E-03 | -12.71 | 4.78 | 0.06 | 3.26E-04 | -20.59 | 5.54 | 9.05E-06 | -16.07 | 0.28 | 13.61 |
| 1  | rs12035442  | <i>LINC02608</i>     | A/C     | 0.14 | 1.77E-03 | 11.49  | 3.65 | 0.22 | 2.12E-03 | 10.39  | 3.32 | 9.17E-06 | 10.89  | 0.82 | 0     |
| 1  | rs11119862  | <i>LINC02608</i>     | A/G     | 0.14 | 1.77E-03 | 11.48  | 3.65 | 0.22 | 2.12E-03 | 10.39  | 3.32 | 9.18E-06 | 10.89  | 0.82 | 0     |
| 5  | rs6871743   | <i>LINC01184</i>     | A/G     | 0.14 | 1.93E-02 | 8.93   | 3.80 | 0.17 | 1.40E-04 | 14.65  | 3.75 | 9.21E-06 | 11.83  | 0.28 | 12.9  |
| 5  | rs6889756   | <i>LINC01184</i>     | T/C     | 0.14 | 1.93E-02 | 8.94   | 3.80 | 0.17 | 1.45E-04 | 14.60  | 3.74 | 9.43E-06 | 11.81  | 0.29 | 11.34 |
| 8  | rs56677333  | <i>DEFB1</i>         | A/C     | 0.10 | 4.71E-03 | -12.83 | 4.49 | 0.06 | 6.82E-04 | -18.65 | 5.36 | 9.55E-06 | -15.23 | 0.41 | 0     |
| 8  | rs59058429  | <i>DEFB1</i>         | C/T     | 0.09 | 8.58E-03 | -12.68 | 4.79 | 0.06 | 3.43E-04 | -20.53 | 5.54 | 9.67E-06 | -16.03 | 0.28 | 12.97 |
| 9  | rs10759298  | <i>RPL36P14</i>      | T/G     | 0.43 | 1.62E-02 | 6.06   | 2.50 | 0.42 | 1.33E-04 | 10.97  | 2.79 | 9.72E-06 | 8.24   | 0.19 | 41.72 |

<sup>a</sup> The beta value refers to the regression coefficient of the quantitative trait analysis and represents the effect size of the minor allele on the level of fatigue as determined as fVAS (mm).

<sup>b</sup> Cochran's Q statistic p-value

<sup>c</sup> I<sup>2</sup> heterogeneity index

MAF, minor allele frequency; SE, standard error
