# Supplementary material for: Genetic variants at the RTP4/MASP1 locus are associated with fatigue in Scandinavian patients with primary Sjögren’s syndrome
Source: HighWire-hosted journal article supplement (doi:10.1136/rmdopen-2021-001832), 2021-12-01
Supplement: rmdopen-2021-001832supp008_data_supplement.pdf [file rmdopen-2021-001832supp008_data_supplement.pdf]

**Supplementary Table S7** Genetic variants associated with the level of fatigue in patients with primary Sjögren's syndrome at suggestive significance ( $p < 1 \times 10^{-5}$ ) in the meta-analysis of the UK and USA cohorts

| Chr | Variant     | Locus               | Major/minor allele | UK   |          |                   |      | USA  |          |                   |      | Meta-analysis UK/USA |                   |                |                |
|-----|-------------|---------------------|--------------------|------|----------|-------------------|------|------|----------|-------------------|------|----------------------|-------------------|----------------|----------------|
|     |             |                     |                    | MAF  | P-value  | Beta <sup>a</sup> | SE   | MAF  | P-value  | Beta <sup>a</sup> | SE   | P-value              | Beta <sup>a</sup> | Q <sup>b</sup> | I <sup>c</sup> |
| 3   | rs9879002   | <i>LOC105377110</i> | T/A                | 0.47 | 4.47E-02 | 6.97              | 3.44 | 0.5  | 4.14E-06 | 12.15             | 2.56 | 5.25E-07             | 10.3              | 0.1            | 31.47          |
| 3   | rs9821495   | <i>LOC105377110</i> | A/T                | 0.47 | 4.47E-02 | 6.97              | 3.45 | 0.5  | 4.14E-06 | 12.14             | 2.56 | 5.38E-07             | 10.3              | 0.1            | 30.95          |
| 6   | rs12175002  | <i>PRDMI</i>        | T/G                | 0.1  | 9.20E-04 | 21.49             | 6.36 | 0.06 | 5.14E-04 | 19.38             | 5.47 | 1.01E-06             | 20.28             | 0.84           | 0              |
| 3   | rs6762062   | <i>LOC105377110</i> | T/C                | 0.42 | 9.22E-03 | 9.09              | 3.45 | 0.43 | 5.45E-05 | 10.69             | 2.59 | 1.05E-06             | 10.11             | 0.38           | 0              |
| 6   | rs11967770  | <i>PRDMI</i>        | A/G                | 0.1  | 1.52E-03 | 19.84             | 6.09 | 0.06 | 4.81E-04 | 19.4              | 5.45 | 1.40E-06             | 19.6              | 0.97           | 0              |
| 6   | rs11965440  | <i>PRDMI</i>        | T/C                | 0.1  | 1.52E-03 | 19.84             | 6.09 | 0.06 | 4.81E-04 | 19.41             | 5.46 | 1.42E-06             | 19.6              | 0.97           | 0              |
| 6   | rs78156691  | <i>PRDMI</i>        | T/C                | 0.1  | 1.54E-03 | 19.82             | 6.09 | 0.06 | 4.81E-04 | 19.42             | 5.46 | 1.43E-06             | 19.6              | 0.97           | 0              |
| 6   | rs76514545  | <i>PRDMI</i>        | G/A                | 0.1  | 1.54E-03 | 19.81             | 6.09 | 0.06 | 4.82E-04 | 19.42             | 5.46 | 1.44E-06             | 19.59             | 0.96           | 0              |
| 6   | rs75035475  | <i>PRDMI</i>        | G/A                | 0.1  | 1.54E-03 | 19.81             | 6.09 | 0.06 | 4.81E-04 | 19.42             | 5.46 | 1.44E-06             | 19.59             | 0.96           | 0              |
| 6   | rs78859709  | <i>PRDMI</i>        | T/C                | 0.1  | 1.54E-03 | 19.88             | 6.11 | 0.06 | 4.94E-04 | 19.38             | 5.46 | 1.47E-06             | 19.6              | 0.97           | 0              |
| 3   | rs9815269   | <i>LOC105377110</i> | T/G                | 0.47 | 2.78E-02 | 7.57              | 3.41 | 0.44 | 2.46E-05 | 11.47             | 2.66 | 1.89E-06             | 9.99              | 0.27           | 0              |
| 6   | rs72998845  | <i>STX7</i>         | G/A                | 0.09 | 3.94E-03 | -17.43            | 5.95 | 0.09 | 2.30E-04 | -17.46            | 4.66 | 1.99E-06             | -17.44            | 0.82           | 0              |
| 6   | rs17061323  | <i>STX7</i>         | G/A                | 0.09 | 3.94E-03 | -17.43            | 5.95 | 0.09 | 2.30E-04 | -17.46            | 4.66 | 1.99E-06             | -17.44            | 0.82           | 0              |
| 6   | rs61143379  | <i>STX7</i>         | T/TAC              | 0.09 | 3.95E-03 | -17.42            | 5.95 | 0.09 | 2.30E-04 | -17.46            | 4.66 | 1.99E-06             | -17.44            | 0.82           | 0              |
| 6   | rs2282315   | <i>STX7</i>         | A/G                | 0.09 | 3.95E-03 | -17.42            | 5.95 | 0.09 | 2.30E-04 | -17.46            | 4.66 | 1.99E-06             | -17.44            | 0.82           | 0              |
| 6   | rs12207033  | <i>STX7</i>         | C/T                | 0.09 | 3.95E-03 | -17.42            | 5.95 | 0.09 | 2.30E-04 | -17.46            | 4.66 | 1.99E-06             | -17.44            | 0.82           | 0              |
| 6   | rs3757298   | <i>STX7</i>         | A/C                | 0.09 | 3.95E-03 | -17.42            | 5.95 | 0.09 | 2.30E-04 | -17.46            | 4.66 | 1.99E-06             | -17.44            | 0.82           | 0              |
| 6   | rs3778572   | <i>STX7</i>         | T/C                | 0.09 | 3.95E-03 | -17.42            | 5.95 | 0.09 | 2.30E-04 | -17.46            | 4.66 | 1.99E-06             | -17.44            | 0.82           | 0              |
| 6   | rs12199903  | <i>STX7</i>         | C/T                | 0.09 | 3.96E-03 | -17.42            | 5.95 | 0.09 | 2.30E-04 | -17.46            | 4.66 | 1.99E-06             | -17.44            | 0.82           | 0              |
| 6   | rs72996869  | <i>STX7</i>         | T/G                | 0.09 | 4.02E-03 | -17.41            | 5.95 | 0.09 | 2.31E-04 | -17.46            | 4.66 | 2.00E-06             | -17.44            | 0.82           | 0              |
| 6   | rs3823289   | <i>STX7</i>         | C/T                | 0.09 | 3.93E-03 | -17.43            | 5.95 | 0.09 | 2.34E-04 | -17.44            | 4.66 | 2.01E-06             | -17.44            | 0.82           | 0              |
| 6   | rs12210721  | <i>STX7</i>         | G/C                | 0.09 | 4.02E-03 | -17.35            | 5.94 | 0.09 | 2.30E-04 | -17.46            | 4.66 | 2.03E-06             | -17.42            | 0.81           | 0              |
| 6   | rs145967325 | <i>STX7</i>         | T/TTTTCAA<br>C     | 0.09 | 4.02E-03 | -17.35            | 5.94 | 0.09 | 2.30E-04 | -17.46            | 4.66 | 2.03E-06             | -17.42            | 0.81           | 0              |
| 6   | rs56009841  | <i>STX7</i>         | C/T                | 0.09 | 4.04E-03 | -17.41            | 5.95 | 0.09 | 2.85E-04 | -17.32            | 4.69 | 2.46E-06             | -17.35            | 0.83           | 0              |
| 18  | rs11664535  | <i>CNDP1</i>        | G/A                | 0.15 | 7.94E-03 | 12.77             | 4.75 | 0.17 | 1.60E-04 | 13.13             | 3.41 | 2.66E-06             | 13.01             | 0.93           | 0              |
| 18  | rs34570315  | <i>CNDP1</i>        | C/T                | 0.15 | 7.90E-03 | 12.78             | 4.75 | 0.17 | 1.81E-04 | 13.14             | 3.44 | 2.99E-06             | 13.01             | 0.93           | 0              |
| 6   | rs60959485  | <i>PRDMI</i>        | C/T                | 0.1  | 2.86E-03 | 18.52             | 6.06 | 0.06 | 5.21E-04 | 19.33             | 5.47 | 3.00E-06             | 18.95             | 0.86           | 0              |
| 6   | rs9399961   | <i>PRDMI</i>        | C/T                | 0.1  | 2.93E-03 | 18.53             | 6.09 | 0.06 | 5.48E-04 | 19.29             | 5.47 | 3.21E-06             | 18.95             | 0.86           | 0              |
| 3   | rs4679564   | <i>LOC105377110</i> | G/A                | 0.29 | 3.74E-02 | 7.57              | 3.61 | 0.3  | 3.89E-05 | 11.73             | 2.79 | 4.05E-06             | 10.17             | 0.31           | 1              |
| 16  | rs9932908   | <i>LOC105371307</i> | A/G                | 0.14 | 4.23E-02 | -11.02            | 5.38 | 0.12 | 4.29E-05 | -16.84            | 4.03 | 4.82E-06             | -14.75            | 0.51           | 0              |

|    |            |                     |     |      |          |        |      |      |          |        |      |          |        |      |   |
|----|------------|---------------------|-----|------|----------|--------|------|------|----------|--------|------|----------|--------|------|---|
| 16 | rs7206806  | <i>LOC105371307</i> | T/A | 0.14 | 4.19E-02 | -11.04 | 5.38 | 0.12 | 4.42E-05 | -16.82 | 4.03 | 4.86E-06 | -14.74 | 0.51 | 0 |
| 16 | rs11645800 | <i>LOC105371307</i> | A/G | 0.14 | 4.23E-02 | -11.02 | 5.38 | 0.12 | 4.33E-05 | -16.83 | 4.03 | 4.87E-06 | -14.74 | 0.51 | 0 |
| 7  | rs2107587  | <i>CRPPA</i>        | C/T | 0.33 | 6.00E-03 | -10.1  | 3.62 | 0.33 | 5.54E-04 | -10.11 | 2.88 | 7.32E-06 | -10.1  | 0.58 | 0 |
| 7  | rs6958419  | <i>CRPPA</i>        | T/C | 0.45 | 1.21E-02 | 8.52   | 3.35 | 0.44 | 2.68E-04 | 10.09  | 2.72 | 7.36E-06 | 9.47   | 0.92 | 0 |

<sup>a</sup> The beta value refers to the regression coefficient of the quantitative trait analysis and represents the effect size of the minor allele on the level of fatigue as determined as fVAS (mm).

<sup>b</sup> Cochran's Q statistic p-value

<sup>c</sup> I<sup>2</sup> heterogeneity index

MAF, minor allele frequency; SE, standard error
