# Supplementary material for: Genetic variants at the RTP4/MASP1 locus are associated with fatigue in Scandinavian patients with primary Sjögren’s syndrome
Source: HighWire-hosted journal article supplement (doi:10.1136/rmdopen-2021-001832), 2021-12-01
Supplement: rmdopen-2021-001832supp009_data_supplement.pdf [file rmdopen-2021-001832supp009_data_supplement.pdf]

**Supplementary Table S8** Results of the association analysis of the *RTP4/MASPI* variants with the level of fatigue in patients with primary Sjögren's syndrome in the UK and USA cohorts

| SNP ID     | Chr | Position<br>(hg19) | A1    | A2 | UK cohort |         |                        | USA cohort |         |                        |
|------------|-----|--------------------|-------|----|-----------|---------|------------------------|------------|---------|------------------------|
|            |     |                    |       |    | MAF       | P value | Beta (SE) <sup>‡</sup> | MAF        | P value | Beta (SE) <sup>‡</sup> |
| rs60344347 | 3   | 187072951          | CCTCT | C  | 0.21      | 0.58    | -2.50 (4.49)           | 0.20       | 0.89    | 0.46 (3.43)            |
| rs7611640  | 3   | 187078402          | G     | A  | 0.21      | 0.57    | -2.55 (4.49)           | 0.20       | 0.91    | -0.39 (3.44)           |
| rs1985269  | 3   | 187072267          | C     | T  | 0.21      | 0.58    | -2.51 (4.49)           | 0.20       | 0.99    | -0.02 (3.42)           |
| rs73182503 | 3   | 187081659          | A     | G  | 0.21      | 0.57    | -2.56 (4.48)           | 0.20       | 0.86    | -0.61 (3.44)           |
| rs7626469  | 3   | 187082771          | C     | G  | 0.21      | 0.57    | -2.56 (4.48)           | 0.20       | 0.84    | -0.69 (3.44)           |
| rs73197558 | 3   | 187066579          | G     | T  | 0.21      | 0.45    | -3.44 (4.51)           | 0.20       | 0.96    | 0.16 (3.38)            |
| rs73197560 | 3   | 187066603          | T     | A  | 0.21      | 0.46    | -3.35 (4.50)           | 0.20       | 0.81    | 0.82 (3.38)            |
| rs73197561 | 3   | 187066709          | A     | G  | 0.21      | 0.64    | -2.08 (4.50)           | 0.20       | 0.81    | 0.83 (3.38)            |

<sup>‡</sup> Regression coefficient of the minor allele and standard error.

MAF, minor allele frequency
