# Supplementary material for: Genetic variants at the RTP4/MASP1 locus are associated with fatigue in Scandinavian patients with primary Sjögren’s syndrome
Source: HighWire-hosted journal article supplement (doi:10.1136/rmdopen-2021-001832), 2021-12-01
Supplement: rmdopen-2021-001832supp010_data_supplement.pdf [file rmdopen-2021-001832supp010_data_supplement.pdf]

**Supplementary Table S9** Genetic variants associated with the level of fatigue in patients with primary Sjögren's syndrome at suggestive significance ( $p < 1 \times 10^{-5}$ ) in the meta-analysis of the Norwegian, Swedish, UK and USA cohorts

| Variant    | Chr | Locus               | Major/minor allele | Meta-analysis Norway/Sweden/UK/USA |                   |                |                |
|------------|-----|---------------------|--------------------|------------------------------------|-------------------|----------------|----------------|
|            |     |                     |                    | P-value                            | Beta <sup>a</sup> | Q <sup>b</sup> | I <sup>c</sup> |
| rs10048170 | 17  | <i>LHX1/LHX1-DT</i> | C/T                | 9.56E-07                           | 7.07              | 0.84           | 0              |
| rs4509075  | 5   | <i>LOC102723654</i> | T/C                | 3.04E-06                           | -8.68             | 0.77           | 0              |

| Variant    | Norway |          |                   |      | Sweden |          |                   |      | UK   |          |                   |      | USA  |          |                   |      |
|------------|--------|----------|-------------------|------|--------|----------|-------------------|------|------|----------|-------------------|------|------|----------|-------------------|------|
|            | MAF    | P value  | Beta <sup>a</sup> | SE   | MAF    | P value  | Beta <sup>a</sup> | SE   | MAF  | P value  | Beta <sup>a</sup> | SE   | MAF  | P value  | Beta <sup>a</sup> | SE   |
| rs10048170 | 0.46   | 6.18E-03 | 7.10              | 2.57 | 0.46   | 3.10E-03 | 9.11              | 3.03 | 0.44 | 4.19E-02 | 7.15              | 3.49 | 0.49 | 4.66E-02 | 5.39              | 2.69 |
| rs4509075  | 0.17   | 3.80E-02 | -7.08             | 3.40 | 0.17   | 3.44E-03 | -11.41            | 3.84 | 0.14 | 2.21E-02 | -10.68            | 4.62 | 0.16 | 3.69E-02 | -7.08             | 3.37 |

<sup>a</sup> The beta value refers to the regression coefficient of the quantitative trait analysis and represents the effect size of the minor allele on the level of fatigue as determined as fVAS (mm).

<sup>b</sup> Cochrane's Q statistic p-value

<sup>c</sup> I<sup>2</sup> heterogeneity index

MAF, minor allele frequency; SE, standard error
